# Supplementary material for: Two-dimensional square-grid iron(ii) coordination polymers showing anion-dependent spin crossover behavior
Source: Royal Society of Chemistry journal article supplement (doi:10.1039/c9ra09782a), 2020-01-01
Supplement: c9ra09782a1.pdf [file c9ra09782a1.pdf]

## Supporting Information

### **Two-dimensional square-grid iron(II) coordination polymers showing anion-dependent spin crossover behavior**

Jong Won Shin,<sup>a</sup> Ah Rim Jeong,<sup>a</sup> Jong Hwa Jeong,<sup>\*,a</sup> Hikaru Zenno,<sup>b</sup> Shinya Hayami,<sup>b</sup> and  
Kil Sik Min<sup>\*,c</sup>

<sup>a</sup> Department of Chemistry, Kyungpook National University, Daegu 41566, Republic of Korea

<sup>b</sup> Department of Chemistry, Kumamoto University, Kumamoto 860-8555, Japan

<sup>c</sup> Department of Chemistry Education, Kyungpook National University, Daegu 41566,  
Republic of Korea

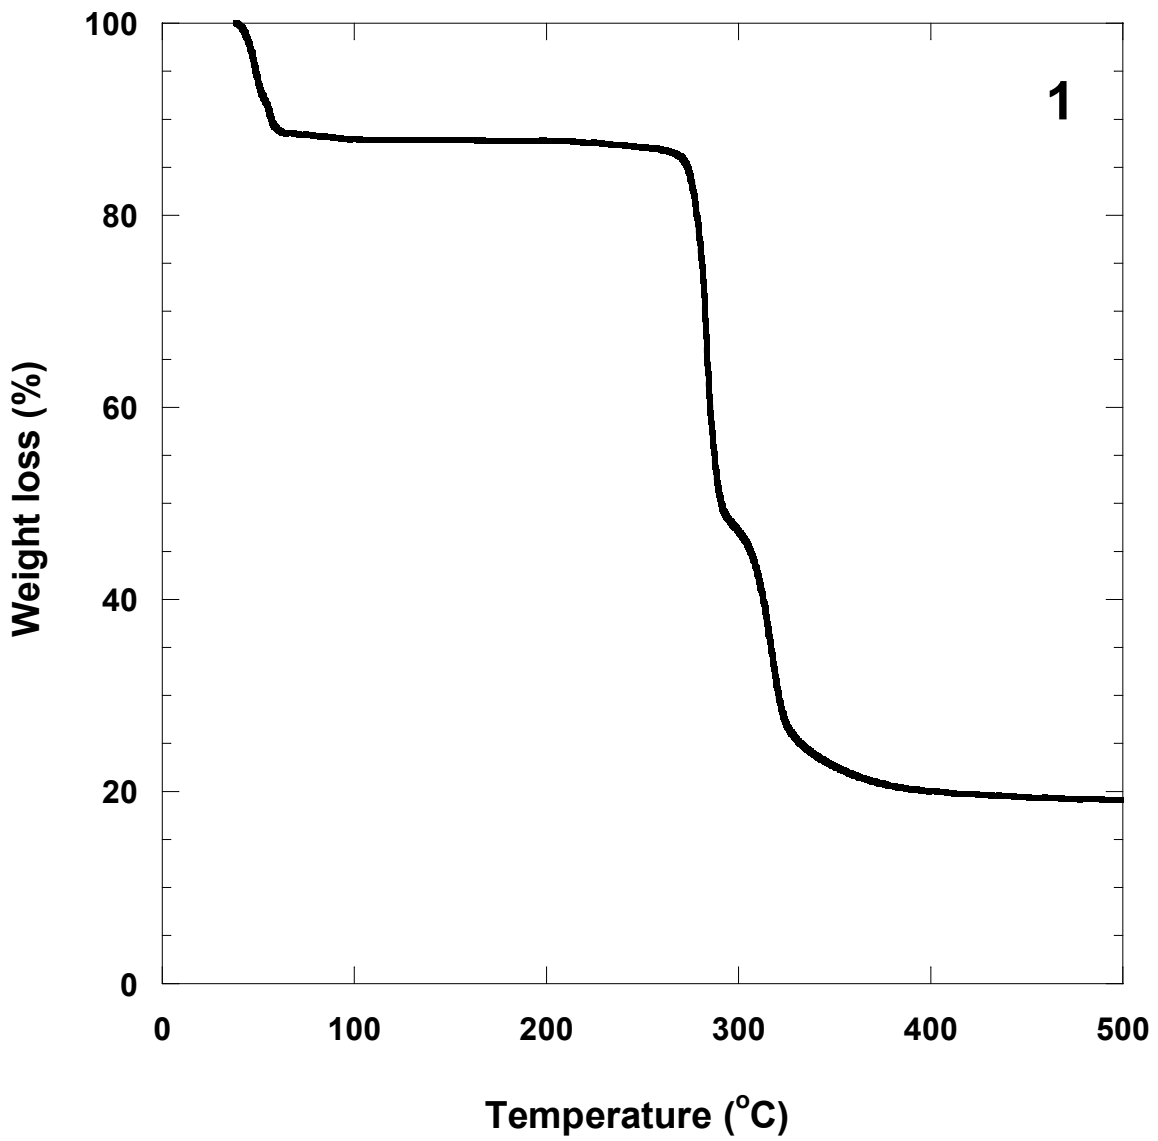

Fig. S1 TGA trace of 1.

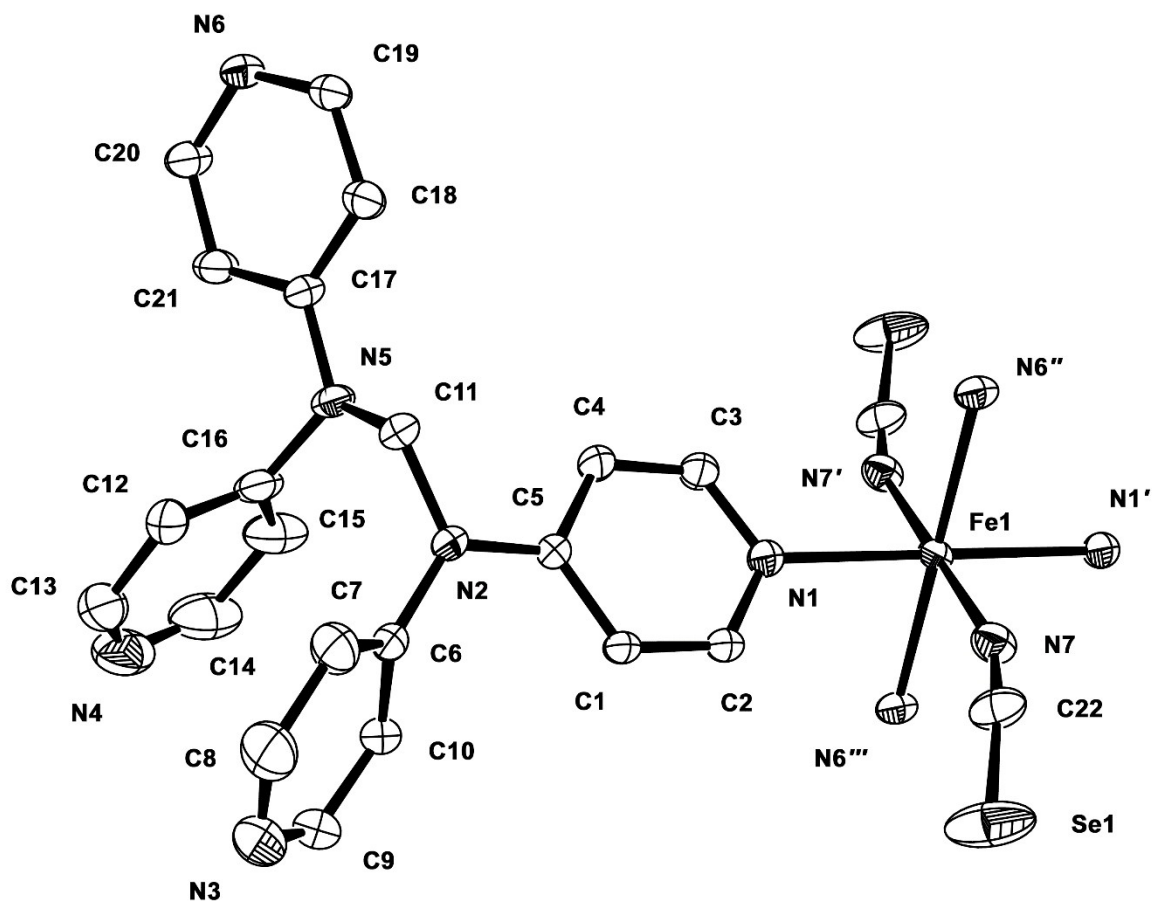

**Fig. S2** ORTEP view of **2a**. The atoms are represented by 30% probable thermal ellipsoid. Hydrogen atoms are omitted for clarity. (')  $-x+1, -y, -z$ ; (')  $-x+1, y+1/2, -z+1/2$ ; (')  $x, -y-1/2, z-1/2$ .

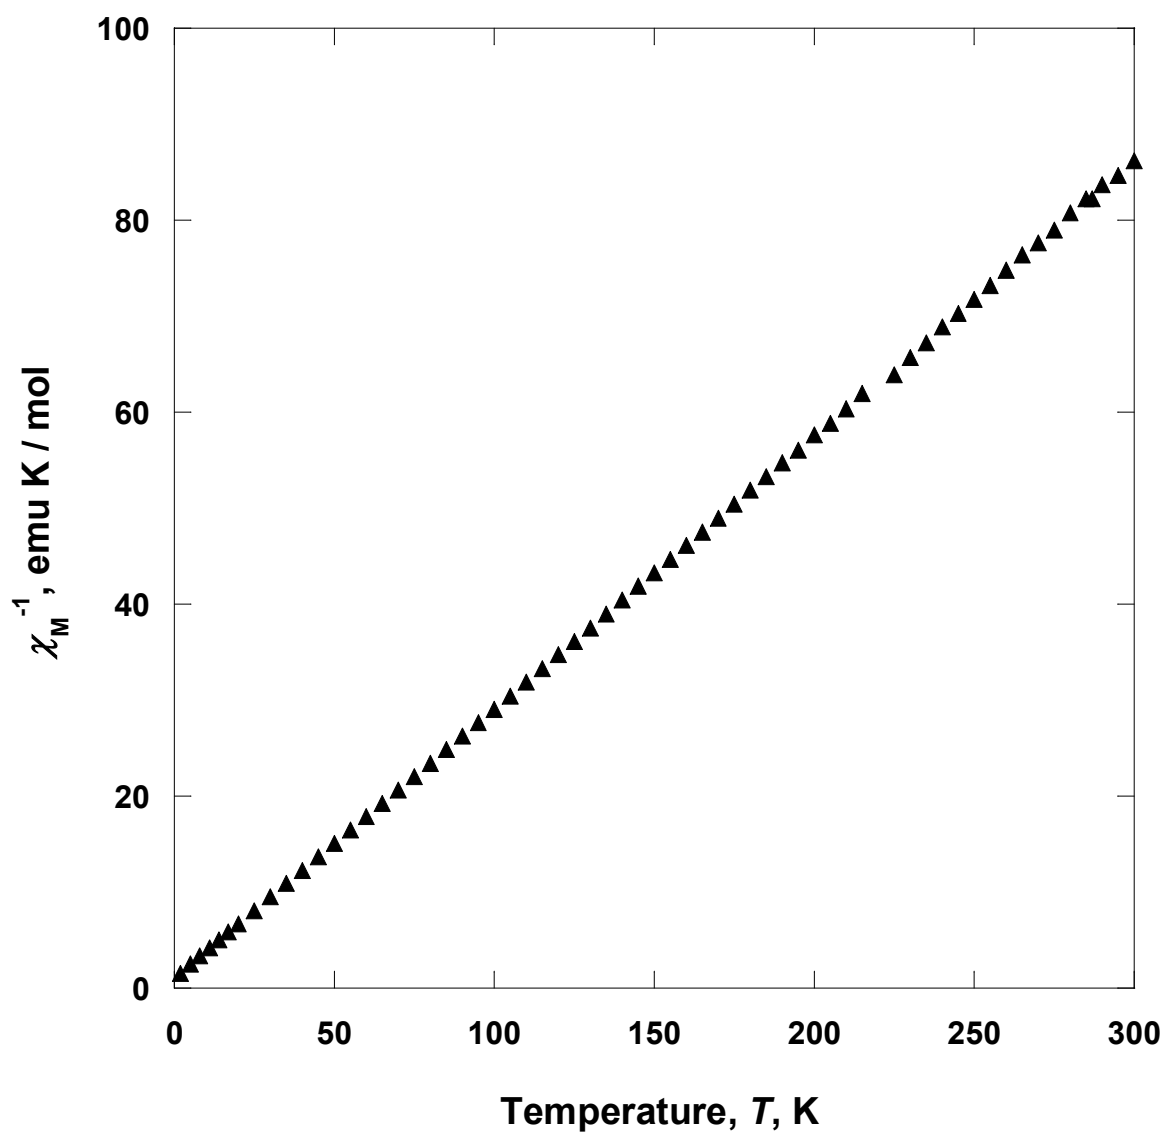

**Fig. S3** Temperature dependence of  $\chi_M^{-1}$  ( $\blacktriangle$ ) for **1** at 5000 Oe upon heating.
